# Supplementary material
Source: PubMed Central journal article supplement (PMC3697532)
Supplement: JB.00153-13_zjb999092667so1.pdf [file JB.00153-13_zjb999092667so1.pdf]

## Supplementary Material:

### Dissecting the metal-selectivity of MerR monovalent metal ion sensors in *Salmonella*

María M. Ibáñez, Sebastián Cerminati, Susana K. Checa, and Fernando C. Soncini#

Instituto de Biología Molecular y Celular de Rosario, Departamento de Microbiología,

Facultad de Ciencias Bioquímicas y Farmacéuticas, Universidad Nacional de Rosario,

Consejo Nacional de Investigaciones Científicas y Técnicas. Ocampo y Esmeralda, 2000-

Rosario, Argentina.

**Table S1.** Bacterial strains and plasmids used in this study

| <b>Strain</b> | <b>Relevant genotype</b>                                   | <b>Reference or source</b> |
|---------------|------------------------------------------------------------|----------------------------|
| PB4406        | LB5010 $\Delta golS$ $golB::kan$                           | Laboratory stock           |
| PB5295        | LB5010 $\Delta cueR::kan$                                  | Laboratory stock           |
| 14028s        | wild type                                                  | ATCC                       |
| PB5257        | $\Delta golS$                                              | (1)                        |
| PB7116        | $golS$ $golB::lacZY^+-kan$                                 | This study                 |
| PB5040        | $golS_L$ $golB::lacZY^+-kan$                               | This study                 |
| PB8261        | $golS_{sL}$ $golB::lacZY^+-kan$                            | This study                 |
| PB7173        | $golS_{C111S}$ $golB::lacZY^+-kan$                         | This study                 |
| PB7169        | $golS_{A113P}$ $golB::lacZY^+-kan$                         | This study                 |
| PB7680        | $golS_{A116D}$ $golB::lacZY^+-kan$                         | This study                 |
| PB8538        | $golS_{L117S}$ $golB::lacZY^+-kan$                         | This study                 |
| PB7171        | $golS_{P118A}$ $golB::lacZY^+-kan$                         | This study                 |
| PB7967        | $golS$ $golB::lacZY^+-kan$ $\Delta cueR-copA::cat$         | This study                 |
| PB8274        | $golS_L$ $golB::lacZY^+-kan$ $\Delta cueR-copA::cat$       | This study                 |
| PB8275        | $golS_{sL}$ $golB::lacZY^+-kan$ $\Delta cueR-copA::cat$    | This study                 |
| PB7968        | $golS_{A113P}$ $golB::lacZY^+-kan$ $\Delta cueR-copA::cat$ | This study                 |
| PB7979        | $golS_{A116D}$ $golB::lacZY^+-kan$ $\Delta cueR-copA::cat$ | This study                 |
| PB9707        | $golS_{L117S}$ $golB::lacZY^+-kan$ $\Delta cueR-copA::cat$ | This study                 |
| PB7969        | $golS_{P118A}$ $golB::lacZY^+-kan$ $\Delta cueR-copA::cat$ | This study                 |
| PB7608        | $golS_{A113S}$ $golB::lacZY^+-kan$                         | This study                 |
| PB7610        | $golS_{A113H}$ $golB::lacZY^+-kan$                         | This study                 |
| PB10441       | $golS_{A113T}$ $golB::lacZY^+-kan$                         | This study                 |
| PB7980        | $golS_{A113S}$ $golB::lacZY^+-kan$ $\Delta cueR-copA::cat$ | This study                 |
| PB7981        | $golS_{A113H}$ $golB::lacZY^+-kan$ $\Delta cueR-copA::cat$ | This study                 |

|         |                                                                                                                            |            |
|---------|----------------------------------------------------------------------------------------------------------------------------|------------|
| PB10448 | <i>golS</i> <sub>A113T</sub> <i>golB</i> :: <i>lacZY</i> <sup>+</sup> - <i>kan</i> $\Delta$ <i>cueR-copA</i> :: <i>cat</i> | This study |
| PB8534  | <i>golS</i> <sub>A113P-A116D</sub> <i>golB</i> :: <i>lacZY</i> <sup>+</sup> - <i>kan</i>                                   | This study |
| PB8536  | <i>golS</i> <sub>A113P-L117S</sub> <i>golB</i> :: <i>lacZY</i> <sup>+</sup> - <i>kan</i>                                   | This study |
| PB7175  | <i>golS</i> <sub>A113P-P118A</sub> <i>golB</i> :: <i>lacZY</i> <sup>+</sup> - <i>kan</i>                                   | This study |
| PB7867  | <i>golS</i> <sub>A116D-L117S</sub> <i>golB</i> :: <i>lacZY</i> <sup>+</sup> - <i>kan</i>                                   | This study |
| PB7675  | <i>golS</i> <sub>A116D-L117S-P118A</sub> <i>golB</i> :: <i>lacZY</i> <sup>+</sup> - <i>kan</i>                             | This study |
| PB8257  | <i>golS</i> <sub>A113P-A116D-P118A</sub> <i>golB</i> :: <i>lacZY</i> <sup>+</sup> - <i>kan</i>                             | This study |
| PB8259  | <i>golS</i> <sub>A113P-L117S-P118A</sub> <i>golB</i> :: <i>lacZY</i> <sup>+</sup> - <i>kan</i>                             | This study |
| PB7673  | <i>golS</i> <sub>C111S-A113P</sub> <i>golB</i> :: <i>lacZY</i> <sup>+</sup> - <i>kan</i>                                   | This study |
| PB7606  | <i>golS</i> <sub>C111S-P118A</sub> <i>golB</i> :: <i>lacZY</i> <sup>+</sup> - <i>kan</i>                                   | This study |
| PB7869  | <i>golS</i> <sub>C111S-A113P-P118A</sub> <i>golB</i> :: <i>lacZY</i> <sup>+</sup> - <i>kan</i>                             | This study |
| PB9388  | <i>cueR</i> - <i>cat</i>                                                                                                   | This study |
| PB7325  | <i>cueR</i> <sub>L</sub> - <i>cat</i>                                                                                      | This study |
| PB10330 | <i>cueR</i> <sub>P113A</sub> - <i>cat</i>                                                                                  | This study |
| PB10851 | <i>cueR</i> <sub>A118P</sub> - <i>cat</i>                                                                                  | This study |
| PB10332 | <i>cueR</i> <sub>P113A-A118P</sub> - <i>cat</i>                                                                            | This study |
| PB10370 | <i>cueR</i> <sub>L</sub> - <i>cat golS</i> :: <i>kan</i>                                                                   | This study |
| PB10371 | <i>cueR</i> <sub>P113A</sub> - <i>cat golS</i> :: <i>kan</i>                                                               | This study |
| PB10852 | <i>cueR</i> <sub>A118P</sub> - <i>cat golS</i> :: <i>kan</i>                                                               | This study |
| PB10373 | <i>cueR</i> <sub>P113A-A118P</sub> - <i>cat golS</i> :: <i>kan</i>                                                         | This study |
| PB5292  | <i>copA-lacZY</i> - <i>cat</i>                                                                                             | (2)        |
| PB7414  | <i>cueR</i> <sub>L</sub> <i>copA-lacZY</i> - <i>cat</i>                                                                    | This study |

### Plasmid

---

|                                              |                                                                                                                 |                    |
|----------------------------------------------|-----------------------------------------------------------------------------------------------------------------|--------------------|
| pKD3                                         | <i>ori</i> <sub>γ</sub> <i>Amp</i> <sup>R</sup> <i>FRT</i> <i>Cm</i> <sup>R</sup> <i>FRT</i>                    | (3)                |
| pCP20                                        | $\lambda$ -cI857-ts <i>P</i> <sub>r</sub> - <i>flp</i> , <i>Amp</i> <sup>R</sup> <i>Cm</i> <sup>R</sup>         | (3)                |
| pKD46                                        | <i>ori</i> <sub>R<sub>pSC101</sub></sub> ts <i>P</i> <sub>araB</sub> <i>exo-bet-gam</i> <i>Amp</i> <sup>R</sup> | (3)                |
| pKG136                                       | <i>ori</i> <sub>R6K</sub> <i>FRT lacZY</i> <sup>+</sup> <i>t</i> <sub>his</sub> <i>Km</i> <sup>R</sup>          | J. M. Slauch       |
| pUH21-2 <i>lacI</i> <sup>q</sup>             | <i>ori</i> <sub>pMB1</sub> <i>Ap</i> <sup>r</sup> <i>lacI</i> <sup>q</sup>                                      | (4)                |
| pMC1871                                      | pBR322, <i>Tc</i> <sup>R</sup> , <i>lacI</i>                                                                    | Amersham Pharmacia |
| pPB1225<br>(p <i>PcopA</i> )                 | pMC1871::P <i>copA</i>                                                                                          | (2)                |
| pPB1205<br>(p <i>GolS</i> )                  | pUH:: <i>golS</i>                                                                                               | (1)                |
| pPB1353<br>(p <i>GolS</i> <sub>P118A</sub> ) | pUH:: <i>golS</i> <sub>P118A</sub>                                                                              | This study         |

**Table S2.** Oligonucleotides used in this study.

| Primer name                                | Sequence (5'-3')                                                                 | 5'- restriction site | Purpose                                       |
|--------------------------------------------|----------------------------------------------------------------------------------|----------------------|-----------------------------------------------|
| <i>golS</i> -F                             | ATGAGGAGGAGCGTCATGAACATCG                                                        | -                    | $\gamma$ Red insertion of <i>golS</i> mutants |
| RvP1- <i>golB</i> -R                       | GTGAACTCCTTTTGTGTGGGAAGCTG                                                       | -                    | $\gamma$ Red insertion of <i>golS</i> mutants |
| <i>golB</i> -P1-F                          | CACTGGCAAGGTCCAGACTGGCAACAGTTCCCACACAAAAGGAGTTCCTACT<br>GTGTAGGCTGGAGCTGCTTCG    | -                    | $\gamma$ Red insertion of <i>golS</i> mutants |
| <i>golB</i> -P2-R                          | TGGCTAGCGTATCGCGACCGGCTGTGCGCCAGACCGATCGCCATTGACGAC<br>ATATGAATATCCTCCTTA        | -                    | $\gamma$ Red insertion of <i>golS</i> mutants |
| <i>golS<sub>L</sub></i> -R                 | GGTTGTCCAAGCGTATGCAGAATGGGGCAATCGGGCGCTGTCATCGCCAGG<br>GCAGGCATTGCCAGCGCTTTGAGGG | -                    | Mutagenesis of <i>golS</i>                    |
| <i>golS<sub>L</sub></i> -R                 | GCAATCTGCGCTGTCGTCGCCGGGGCAGCA                                                   | -                    | Mutagenesis of <i>golS</i>                    |
| <i>golS<sub>C111S</sub></i> -R             | CGCCGGCGCAGGAGTGAATCAGCG                                                         | -                    | Mutagenesis of <i>golS</i>                    |
| <i>golS<sub>A113P</sub></i> -R             | CGCCGGGGCAGCAGTGAATCAG                                                           | -                    | Mutagenesis of <i>golS</i>                    |
| <i>golS<sub>A116D</sub></i> -R             | GGCAATCTGGCAGGTCGTCGCCGGGGCAGCA                                                  | -                    | Mutagenesis of <i>golS</i>                    |
| <i>golS<sub>L117S</sub></i> -R             | GCAATCTGGGCTCGCGTCGCCCGCGCAGCA                                                   | -                    | Mutagenesis of <i>golS</i>                    |
| <i>golS<sub>P118A</sub></i> -R             | GCAATCTGCCAGCGCGTCCG                                                             | -                    | Mutagenesis of <i>golS</i>                    |
| <i>golS<sub>A113P-A116D</sub></i> -R       | GCAATCTGGCAGGTCGTCGCCGGGGCAGCA                                                   | -                    | Mutagenesis of <i>golS</i>                    |
| <i>golS<sub>A113P-L117S</sub></i> -R       | GCAATCTGGGCTCGCGTCGCCGGGGCAGCA                                                   | -                    | Mutagenesis of <i>golS</i>                    |
| <i>golS<sub>A113P-P118A</sub></i> -R       | GCAATCTGCCAGCGCGTCGCCGGGGCAGCAGTG                                                | -                    | Mutagenesis of <i>golS</i>                    |
| <i>golS<sub>A113P-A116D-P118A</sub></i> -R | GCAATCTGCCAGGTCGTCGCCGGGGCAGCA                                                   | -                    | Mutagenesis of <i>golS</i>                    |
| <i>golS<sub>A113P-L117S-P118A</sub></i> -R | GCAATCTGCGCTCGCGTCGCCGGGGCAGCA                                                   | -                    | Mutagenesis of <i>golS</i>                    |
| <i>golS<sub>A116D-L117S</sub></i> -R       | GAATGGGGCAATCTGGGCTGTGTCGCCGGGGCAGCA                                             | -                    | Mutagenesis of <i>golS</i>                    |
| <i>golS<sub>A116D-L117S-P118A</sub></i> -R | GCAGAATGGGGCAATCGGGCGCTGTCGTCGCCGGGGCAGCAGT                                      | -                    | Mutagenesis of <i>golS</i>                    |
| <i>golS<sub>A113S</sub></i> -R             | GCAGCGCGTCGCCACTGCAGCAGTGAAT                                                     | -                    | Mutagenesis of <i>golS</i>                    |
| <i>golS<sub>A113H</sub></i> -R             | GCAGCGCGTCGCCGTGGCAGCAGTGAAT                                                     | -                    | Mutagenesis of <i>golS</i>                    |
| <i>golS<sub>A113T</sub></i> -R             | CAATCTGGCAGCGCGTCGCCCGTGCAGCA                                                    | -                    | Mutagenesis of <i>golS</i>                    |
| <i>golS<sub>C111S-A113P</sub></i> -R       | GCAGCGCGTCGCCGGGGCAACTGTGAATCA                                                   | -                    | Mutagenesis of <i>golS</i>                    |
| <i>golS<sub>C111S-P118A</sub></i> -R       | GCAATCTGCCAGCGCGTCGCCGGGGCAACTGTGAAT                                             | -                    | Mutagenesis of <i>golS</i>                    |
| <i>golS<sub>C111S-A113P-P118A</sub></i> -R | GCAATCTGCCAGCGCGTCGCCGGGGCAGCTGTGAAT                                             | -                    | Mutagenesis of <i>golS</i>                    |
| <i>golS</i> -ORF-F                         | GAGGATCCATATGAACATCGGTTAAAGC                                                     | <i>Bam</i> HI        | Cloned <i>golS</i>                            |
| <i>golS</i> -ORF-R                         | ACCCAAGCTTACAGACGCTTTGCCAG                                                       | <i>Hind</i> III      | Cloned <i>golS</i>                            |
| <i>cueR</i> -F                             | GAGGATCCATATGAATATTAGCG                                                          | <i>Bam</i> HI        | $\gamma$ Red insertion of <i>cueR</i> mutants |
| RvP1- <i>cueR</i> -R                       | CCGCCGGTTTATGCTTGATGCCGCGTTAGT                                                   | -                    | $\gamma$ Red insertion of <i>cueR</i> mutants |
| <i>cueR</i> -P1-F                          | CCGTCCGTTCACTAACCGGCATCAAGCATAAACC GGCGGCTGTGTAGGCT<br>GGAGCTGCTTCG              | -                    | $\gamma$ Red insertion of <i>cueR</i> mutants |
| <i>cueR</i> -P2-R                          | GCCTTAACGTTGCTGGCGGCTGGCTTTGGTGGCGCTGGCCATATGAATAT<br>CCTCCTTA                   | -                    | $\gamma$ Red insertion of <i>cueR</i> mutants |
| <i>cueR<sub>L</sub></i> -R                 | CAGCCGAAAGATTATCAATAATCGGGCAGTCTGGCAGCGCTGCCGGC<br>GCAGCAGTGAATCAGCGCCAACAGTT    | -                    | Mutagenesis of <i>cueR</i>                    |
| <i>cueR<sub>P113A</sub></i> -R             | GCTGTCATCGCCGGCACAACCTCTCCGCCA                                                   | -                    | Mutagenesis of <i>cueR</i>                    |
| <i>cueR<sub>A118P</sub></i> -R             | CAATAATCGGGCAGTCGGGGTGTGTCATCGCCGGGA                                             | -                    | Mutagenesis of <i>cueR</i>                    |
| <i>cueR<sub>P113A-A118P</sub></i> -R       | CGGGCAGTCGGGGTGTGTCATCGCCGGCACAACCTCTCCGCCA                                      | -                    | Mutagenesis of <i>cueR</i>                    |
| <i>cueR-copA</i> -P1-F                     | CAACGTGGCTTTTGCCTTGTGATGACAGCAGCCGAAACATATGAATAT<br>CCTCCTTA                     | -                    | $\gamma$ Red deletion of <i>cueR-copA</i>     |
| <i>cueR-copA</i> -P2-R                     | AACGCTATATCAGGCAGCATCAGCTGCCTGATATATTATTTGTAGGCTGGA<br>GCTGCTTCG                 | -                    | $\gamma$ Red deletion of <i>cueR-copA</i>     |
| <i>PgolB</i> -F                            | GACCCGGGACGTATCCAGAACATGC                                                        | <i>Xma</i> I         | Electrophoretic gel mobility shift assays     |
| <i>PgolB</i> -R                            | TCCCCGGGGCAGCCGCCGAGGTC                                                          | <i>Xma</i> I         | Electrophoretic gel mobility shift assays     |

## Supplementary References

1. **Checa SK, Espariz M, Pérez Audero ME, Botta PE, Spinelli SV, Soncini FC.** 2007. Bacterial sensing of and resistance to gold salts. *Mol Microbiol* **63**:1307-1318.
2. **Pérez Audero ME, Podoroska BM, Ibáñez MM, Cauerhff A, Checa SK, Soncini FC.** 2010. Target transcription binding sites differentiate two groups of MerR-monovalent metal ion sensors. *Mol Microbiol* **78**:853-865.
3. **Datsenko KA, Wanner BL.** 2000. One-step inactivation of chromosomal genes in *Escherichia coli* K-12 using PCR products. *Proc Natl Acad Sci U S A* **97**:6640-6645.
4. **Soncini FC, García Vescovi E, Groisman EA.** 1995. Transcriptional autoregulation of the *Salmonella typhimurium* *phoPQ* operon. *J Bacteriol* **177**:4364-4371.
